# Supplementary material for: Pancreatic β cell–selective zinc transporter 8 insufficiency accelerates diabetes associated with islet amyloidosis
Source: JCI journal article supplement (doi:10.1172/jci.insight.143037), 2021-05-23
Supplement: sd1 [file 1]

## **SUPPLEMENTAL METHODS.**

**Immunohistochemistry staining.** Paraffin embedded sections were stained with anti-insulin (DAKO, Carpinteria, CA) or anti-glucagon (Abcam, Toronto, ON) as described previously (1). Images were taken using Aperio ImageScope at 20x magnification. All quantifications were performed by HALO version 2.0.1145.14 (Indica Labs, Corrales, NM).

1. Untereiner A, Abdo S, Bhattacharjee A, Gohil H, Pourasgari F, Ibeh N, et al. GABA promotes beta-cell proliferation, but does not overcome impaired glucose homeostasis associated with diet-induced obesity. *FASEB J.* 2019;33(3):3968-84.

Supp. Figure. 1. Cre didn't impact glucose homeostasis and hGH protein is not expressed in islets. Oral glucose tolerance test on Chow-fed A) 6 weeks of age in transgenic mice expressing Cre (n=7) and ZnT8 fl/fl (n=6). In vivo assessment of 8-10 weeks HFD-fed hIAPP mice with/without Cre expression on (B) Body weight, (C) 5h fasted blood glucose, (D) Oral glucose tolerance test (OGTT) and (E) Insulin secretion during OGTT. B-E, Cre<sup>+</sup> hIAPP (n=6) and Cre<sup>-</sup> hIAPP (n=8). (F) cDNA PCR of hGH on Cre<sup>+</sup> WT and Cre<sup>-</sup> ZnT8<sup>fl/fl</sup> islet samples. (G) Total islet hGH content and (H) total islet insulin content was measured in Ctrl (n=4), ZnT8B<sup>-/-</sup> (n=4), hIAPP (n=4) and ZnT8B<sup>-/-</sup>: hIAPP (n=4) mouse islets. Human plasma sample was used as positive control for hGH Elisa. The dotted line represents the sensitivity for hGH ELISA (Y=5 pg/ml). One-way ANOVA with Turkey adjustment was used in A, D, E and H. Unpaired T test was B and C. Data was represented as mean±sem.

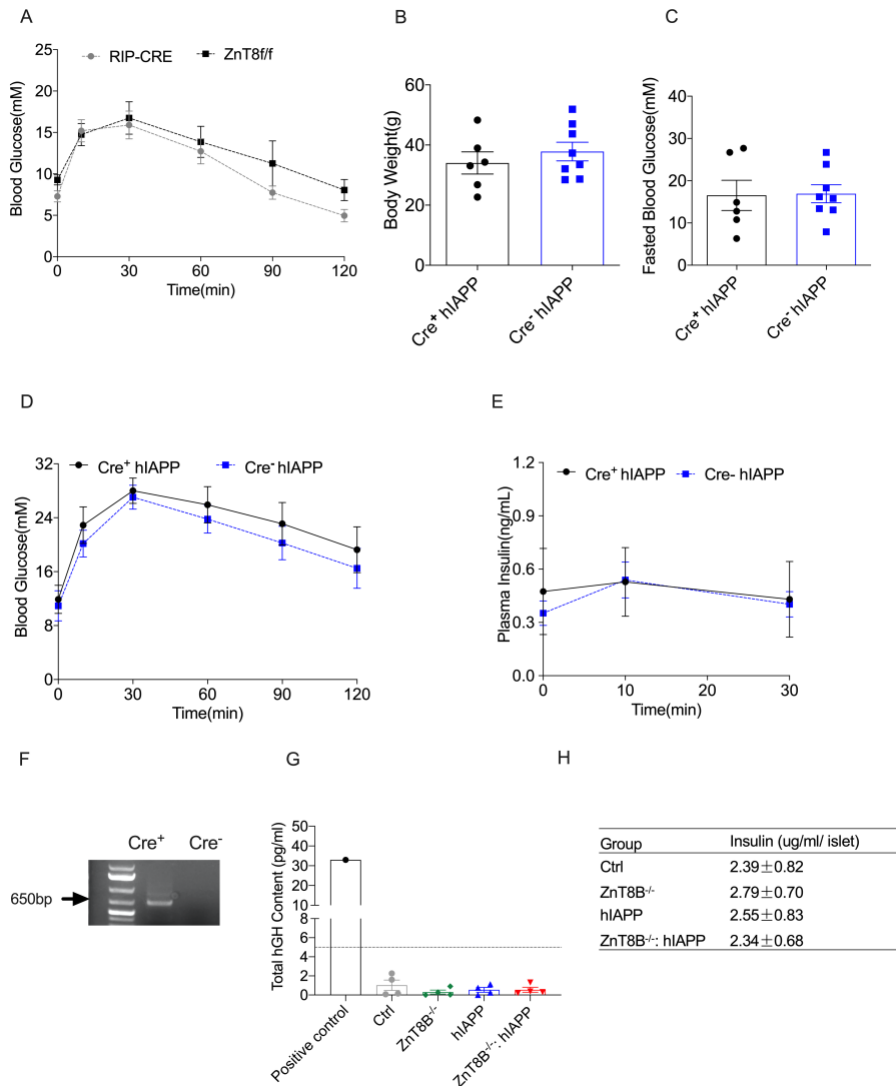

Supp. Figure. 2 ZnT8B<sup>-/-</sup>: hIAPP and hIAPP male mice impaired glucose tolerance and insulin secretion after 20-22 weeks chow or HFD feeding. A) and (F) Body weight, (B) and (G) 5h fasted blood glucose, (C) and (H) 5h fasted plasma insulin, (D) and (I) oral glucose tolerance test (OGTT) with area under the glucose curve, (E) and (J) Insulin secretion during OGTT \*P<0.05, \*\*P<0.01, \*\*\*P<0.001, ZnT8B<sup>-/-</sup>: hIAPP, hIAPP and ZnT8B<sup>-/-</sup> vs. Ctrl, ## P<0.01, #### P<0.0001, ZnT8B<sup>-/-</sup>: hIAPP compared to ZnT8B<sup>-/-</sup>. One-way ANOVA with Turkey adjustment was used in A-J. Two-way ANOVA with Dunnett correction was used in D, I. A-E, Ctrl (n=4). ZnT8B<sup>-/-</sup> (n=5) hIAPP(n=5) and ZnT8B<sup>-/-</sup>: hIAPP(n=6). F-G, Ctrl (n=9). ZnT8B<sup>-/-</sup> (n=5) hIAPP(n=7) and ZnT8B<sup>-/-</sup>: hIAPP(n=9).

20-22 weeks Chow

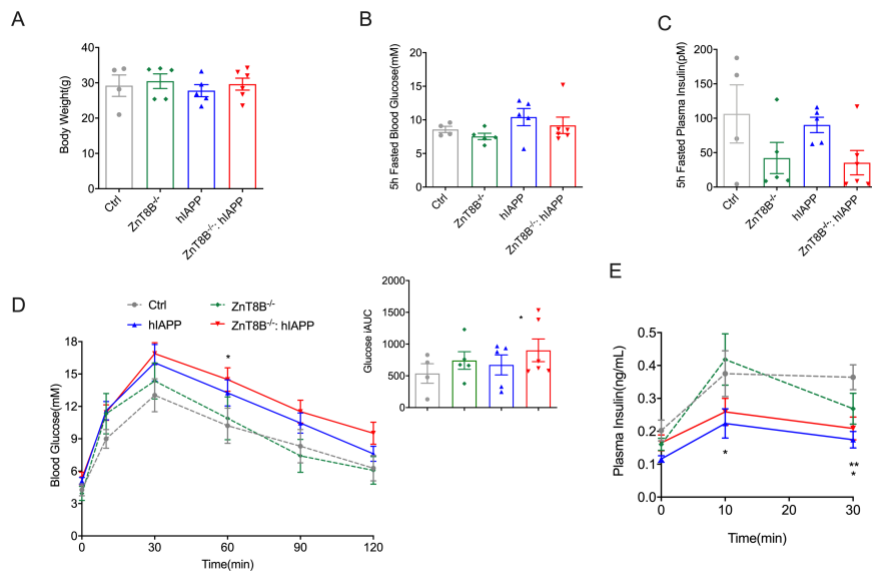

20-22 weeks HFD

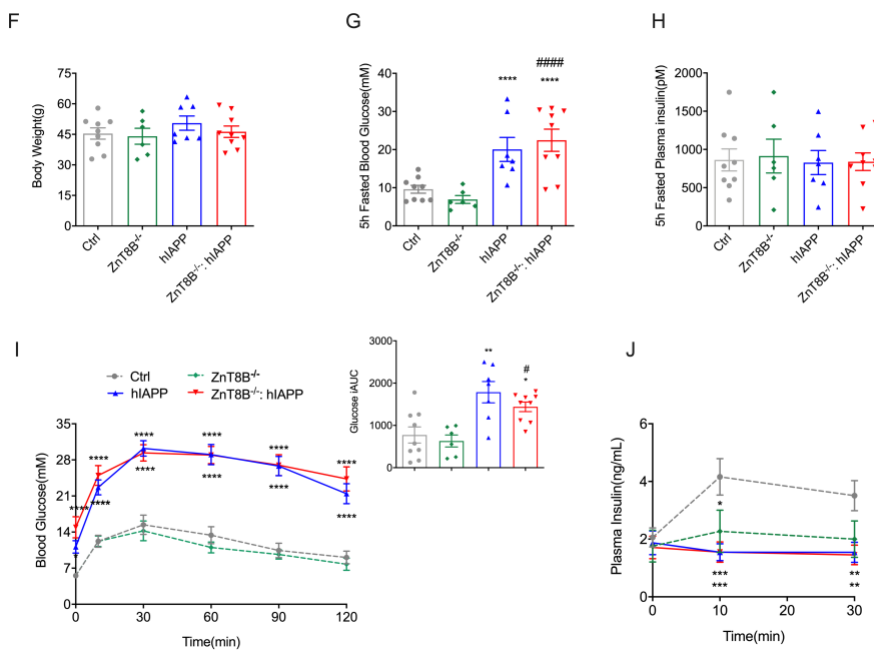

Supp. Figure. 3. 8-10 weeks high fat fed  $ZnT8B^{-/-}$ : hIAPP mice has normal islet size and number. (A) Histological analysis of insulin staining (n=3 mice/genotype. Scale bar, 50um) with quantification of (B) islet size distribution and (C) average islet size and (D) islet density measured as islet number per the area of pancreatic section. (E) quantification of glucagon positive area per total section area. (F) Histological analysis of glucagon staining (n=3 mice/genotype. Scale bar, 50um) with quantification of glucagon positive area per total section area. One-way ANOVA with Turkey adjustment was used in B, C, D, E and G.

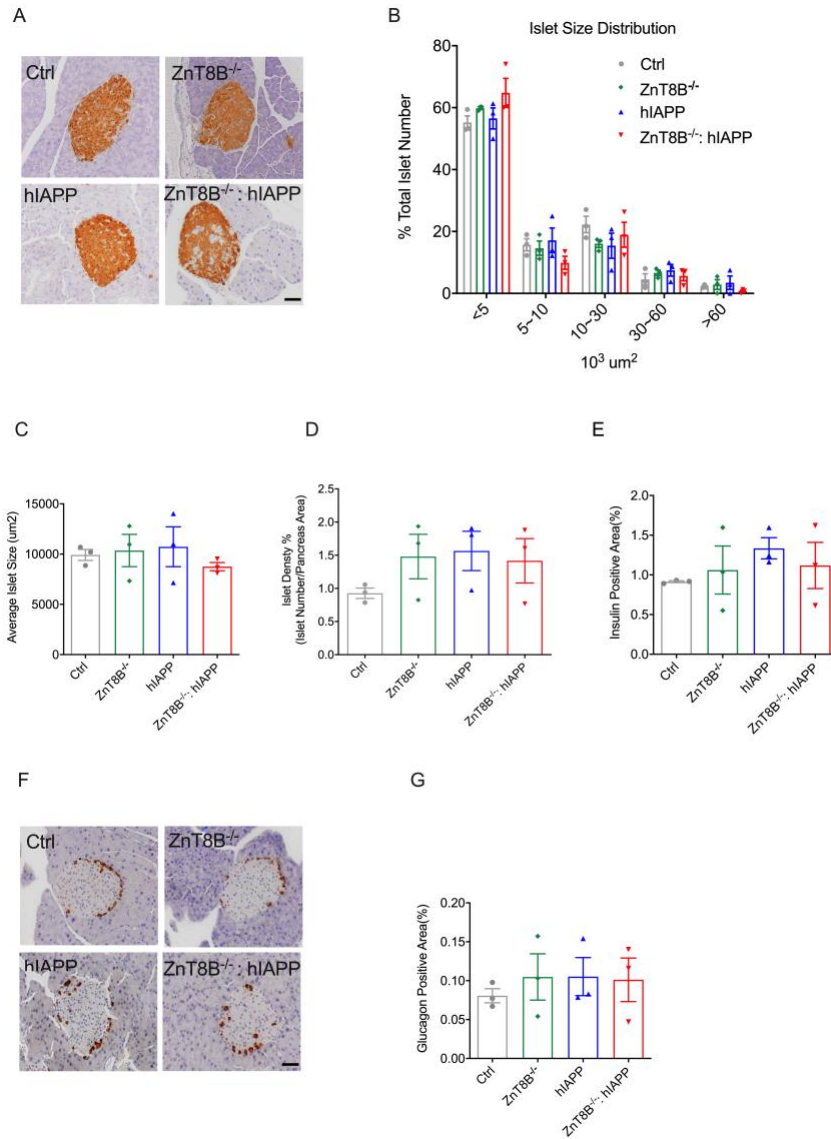

Suppl. Table 1, summarized phenotypes of  $ZnT8B^{-/-}$ , hIAPP, and  $ZnT8B^{-/-}$ : hIAPP mice compared to Ctrl under chow and HFD-fed condition.

|             | $ZnT8B^{-/-}$ | hIAPP | $ZnT8B^{-/-}$ : hIAPP |
|-------------|---------------|-------|-----------------------|
| Body weight | -             | -     | -                     |

|                    |                                       |                  |                                  |                               |
|--------------------|---------------------------------------|------------------|----------------------------------|-------------------------------|
| 8-10 weeks<br>chow | 5h fasted<br>blood glucose            | -                | -                                | -                             |
|                    | overnight<br>fasted plasma<br>insulin | -                | -                                | -                             |
|                    | OGTT                                  | -                | -                                | Mild impaired                 |
|                    | Insulin during<br>OGTT                | -                | -                                | Mild impaired                 |
|                    | Insulin<br>sensitivity                | -                | -                                | -                             |
| 8-10 weeks<br>HFD  | Body weight                           | -                | -                                | -                             |
|                    | 5h fasted<br>blood glucose            | -                | Hyperglycem<br>ia                | Hyperglycemia                 |
|                    | 5h fasted<br>plasma insulin           | -                | -                                | hyperinsulinemia              |
|                    | OGTT                                  | Mild<br>impaired | Glucose<br>intolerance           | Severe glucose<br>intolerance |
|                    | Insulin during<br>OGTT                | -                | Impaired<br>insulin<br>secretion | Impaired insulin<br>secretion |
|                    | Insulin<br>sensitivity                | -                | -                                | -                             |
|                    | Ex vivo GSIS                          | -                | -                                | Impaired insulin<br>secretion |
|                    | Total insulin<br>content              | -                | -                                | -                             |
|                    | Amyloid<br>prevalence                 | NT               | Detected                         | Increased                     |
|                    | Amyloid<br>severity                   | NT               | Detected                         | Increased                     |
|                    | Beta cell area                        | -                | -                                | Reduced                       |
|                    | Alpha cell<br>area<br>percentage      | -                | -                                | -                             |
|                    | Islet size<br>distribution            | -                | -                                | -                             |
|                    | Islet number                          | -                | -                                | -                             |
|                    | Islet density                         | -                | -                                | -                             |
| Dense-core<br>ISG  | Reduced                               | -                | Reduced                          |                               |

|  |              |           |   |         |
|--|--------------|-----------|---|---------|
|  | Rod-like ISG | Increased | - | Reduced |
|--|--------------|-----------|---|---------|

\*, “-” represented no change versus Ctrl; NT, not detected.
